# Supplementary material for: Morphology-controlled synthesis of porous polymer nanospheres for gas absorption and bioimaging applications
Source: Royal Society of Chemistry journal article supplement (doi:10.1039/c2jm30395g), 2012-01-01

## Supporting information

### **Morphology-controlled synthesis of porous polymer nanospheres for gas absorption and bioimaging applications**

*LingLi Zhang, Tingting Lin, Xiaoyong Pan, Weizhi Wang\*, Tianxi Liu*

L. L. Zhang, A/Prof. W. Z. Wang, Prof. T. Liu

State Key Laboratory of Molecular Engineering of Polymers, Department of  
Macromolecular Science, Fudan University, Shanghai 200433

E-mail: weizhiwang@fudan.edu.cn

T. Lin, Dr. X. Pan

Institute of Materials Research and Engineering, A\*STAR (Agency for Science,  
Technology and Research), 3 Research Link, Singapore 117602

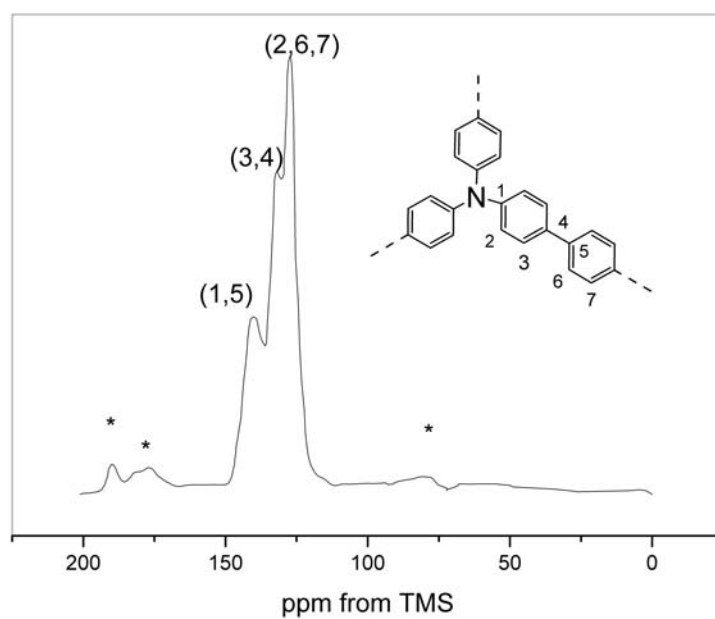

**Figure S1.**  $^{13}\text{C}$  CP/MAS NMR spectrum of the PPS with a reaction time of 40 h. Asterisks denote spinning sidebands.

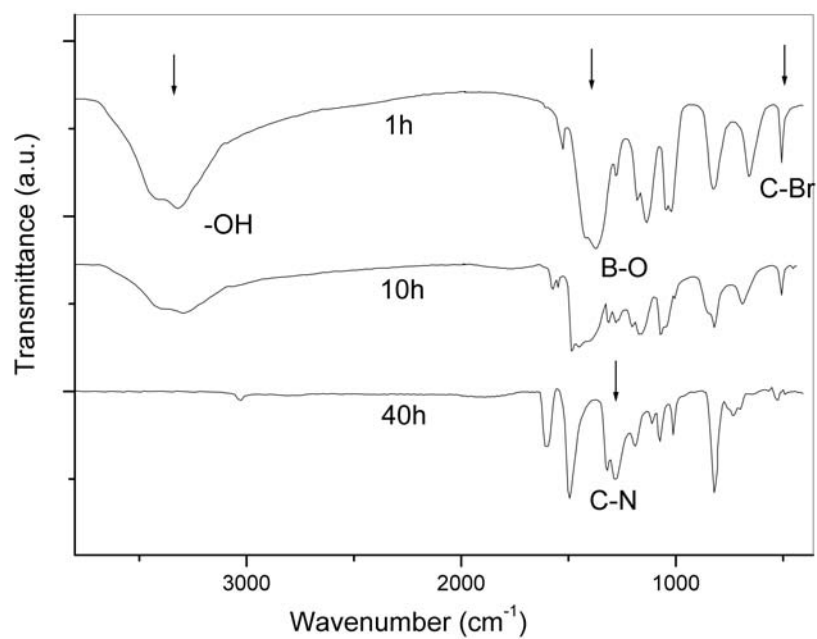

**FigureS2** . FTIR spectra of PPSs with different reaction times.

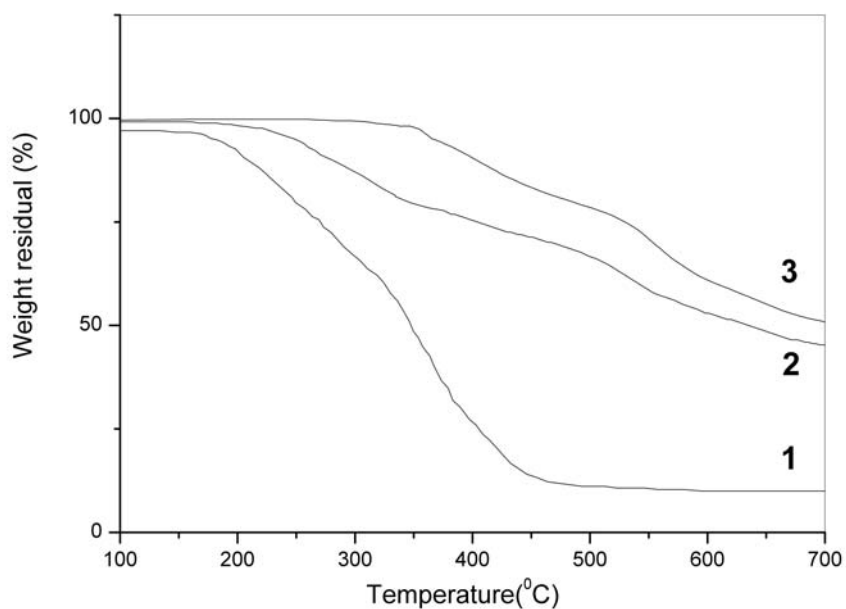

**Figure S3** . TGA curves recorded under N<sub>2</sub> for PPSs with different reaction times: (1) 10 h, (2) 30 h and (3) 40 h.

## Theoretical Calculations.

All periodic DFT calculations were performed using SIESTA code with numerical-orbital basis sets. The exchange-correlation functional used is the generalized gradient-approximation method, known as GGA-PBE. A double-plus polarization basis set was employed. The orbital confining cutoff radii were determined from an energy shift of 0.01 eV. The energy cutoff for the real space grid used to represent the density was set as 150 Ry. To further speed up calculations, Kohn-Sham equation was solved by an iterative parallel diagonalization method that utilizes the ScaLAPACK subroutine pdsygvx with two-dimensional block cyclicly distributed matrix. The accuracy of the SIESTA method was carefully benchmarked with the plane-wave code used previously.

|                     | d <sub>N···N</sub> (Å) nearest d | d <sub>N···N</sub> (Å), diagonal d |      |
|---------------------|----------------------------------|------------------------------------|------|
|                     | 14.327                           | 28.930                             |      |
|                     | 14.099                           | 25.777                             |      |
|                     | 14.353                           | 28.823                             |      |
|                     | 14.291                           | 30.300                             |      |
|                     | 14.285                           | 25.829                             |      |
|                     | 14.267                           | 28.510                             |      |
|                     | 14.312                           | 29.146                             |      |
|                     | 14.376                           | 27.467                             |      |
|                     | 14.360                           | 28.405                             |      |
|                     | 14.308                           | 27.155                             |      |
|                     | 14.134                           | 28.916                             |      |
|                     | 14.348                           | 29.049                             |      |
|                     | 14.306                           | 28.374                             |      |
|                     | 14.304                           | 29.054                             |      |
|                     | 14.175                           | 27.951                             |      |
|                     | 14.239                           | 28.779                             |      |
|                     | 14.231                           | 28.202                             |      |
|                     | 14.262                           | 28.288                             |      |
|                     | 14.304                           | 28.896                             |      |
|                     | 14.282                           | 28.059                             |      |
|                     | 14.250                           | 27.560                             |      |
|                     | 14.282                           | <b>28.260</b>                      | mean |
|                     | 14.207                           | <b>0.7699</b>                      | dev  |
|                     | 14.241                           | 30.300                             | max  |
|                     | 14.306                           | 25.777                             | min  |
| 7pore               | 14.224                           |                                    |      |
| 1056 atoms          | 14.076                           |                                    |      |
| COMPASS (ultrafine) | 14.363                           |                                    |      |

|      |                |  |  |
|------|----------------|--|--|
|      | 14. 316        |  |  |
|      | 14. 246        |  |  |
| mean | <b>14. 269</b> |  |  |
| dev  | <b>0. 0565</b> |  |  |
| max  | 14. 376        |  |  |
| min  | 14. 076        |  |  |

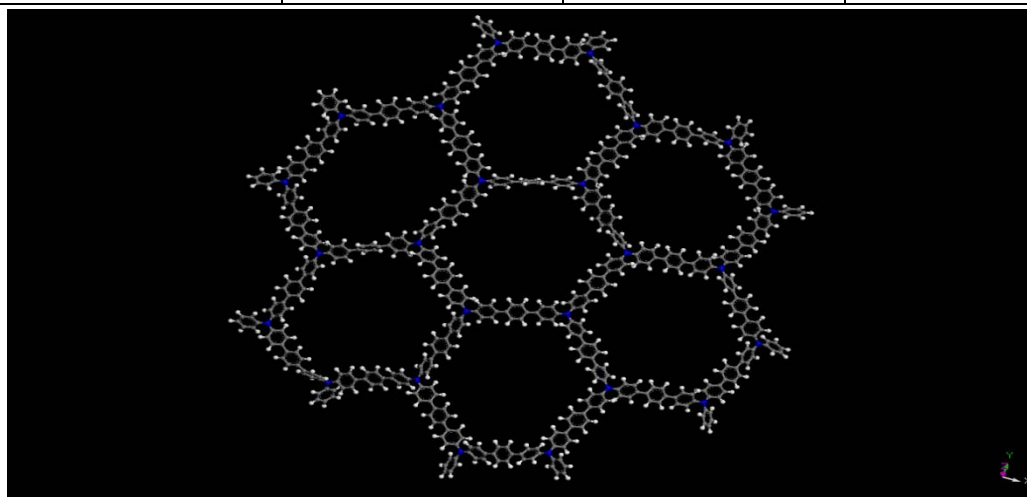

Supplement: c2jm30395g.pdf [file c2jm30395g.pdf]
